1 **Comprehensive analysis of chemical and biological problems associated with**  
2 **browning agents used in aquatic studies**

3  
4 Kristin Scharnweber<sup>1\*+</sup>, Sari Peura<sup>1,2+</sup>, Katrin Attermeyer<sup>1,3</sup>, Stefan Bertilsson<sup>1,4</sup>, Lucas  
5 Bolender<sup>1</sup>, Moritz Buck<sup>1,4</sup>, Karólína Einarsdóttir<sup>1</sup>, Sarahi L. Garcia<sup>1,5</sup>, Raphael Gollnisch<sup>6</sup>,  
6 Charlotte Grasset<sup>1</sup>, Marloes Groeneveld<sup>1</sup>, Jeffrey A. Hawkes<sup>7</sup>, Eva S. Lindström<sup>1</sup>, Christin  
7 Manthey<sup>1,8</sup>, Robyn Övergaard<sup>1</sup>, Karin Rengefors<sup>6</sup>, Vicente T. Sedano-Núñez<sup>1,9</sup>, Lars J. Tranvik<sup>1</sup>,  
8 Anna J. Székely<sup>1</sup>

9  
10 <sup>+</sup>both authors contributed equally

11 <sup>1</sup>Uppsala University, Department of Ecology and Genetics, Limnology, Norbyvägen 18D,  
12 7523618 Uppsala, Sweden

13 <sup>2</sup>Swedish University of Agricultural Sciences, Department of Forest Mycology and Plant  
14 Pathology, Science for Life Laboratory, Almas allé 5, 75651 Uppsala, Sweden

15 <sup>3</sup>current address: WasserCluster Lunz, Dr. Carl Kupelwieser Promenade 5, 3293 Lunz am See,  
16 Austria

17 <sup>4</sup>Lund Swedish University of Agricultural Sciences, Department of Aquatic Sciences and  
18 Assessment, Lennart Hjelm's väg 9, SE75651 Uppsala, Sweden

19 <sup>5</sup>Stockholm University, Department of Ecology, Environment, and Plant Sciences, Science for  
20 Life Laboratory, Svante Arrhenius väg 20 A, 114 18 Stockholm, Sweden

21 <sup>6</sup> Lund University, Department of Biology, Sölvegatan 37, 22362 Lund, Sweden

22 <sup>7</sup> Uppsala University, Analytical Chemistry, Department of Chemistry BMC, Husargatan 3,  
23 75237 Uppsala, Sweden

24 <sup>8</sup> Freie Universität Berlin, Institute of Biology, Evolutionary Biology, Königin-Luise-Str. 1-3,  
25 14195 Berlin-Dahlem, Germany

26 <sup>9</sup> Uppsala University, Molecular Evolution, Department of Cell and Molecular Biology BMC,  
27 Husargatan 3, 75237 Uppsala, Sweden

28

29 \*Corresponding author: Kristin Scharnweber, Uppsala University, Department of Ecology and  
30 Genetics, Limnology, Norbyvägen 18D, 75236 Uppsala, Sweden, Phone: +46 18 471 2796, Fax:  
31 +46 18 471 6310, [Kristin.scharnweber@ebc.uu.se](mailto:Kristin.scharnweber@ebc.uu.se)

32

33 Running head: Problems with browning agents

34 Keywords: HuminFeed, SuperHume, dissolved organic carbon, humic substances, Daphnia,

35 microbial community, *Gonyostomum semen*, terrestrial carbon, reverse osmosis, leonardite

## 36 **Abstract**

37 Inland waters receive and process large amounts of colored organic matter from the terrestrial  
38 surroundings. These inputs dramatically affect the chemical, physical, and biological properties  
39 of water bodies, as well as their roles as global carbon sinks and sources. To understand the  
40 complex changes associated with allochthonous inputs, experiments are needed. However,  
41 manipulative studies, especially at ecosystem scales, require large amounts of dissolved organic  
42 matter with optical and chemical properties resembling indigenous organic matter. Here we  
43 compared the chemical and biological impacts of two leonardite products (HuminFeed (HF) and  
44 SuperHume (SH)) and a freshly derived reverse osmosis concentrate of organic matter (RO) in a  
45 set of comprehensive mesocosm- and laboratory-scale experiments and analyses.

46 The chemical properties of RO concentrate and the leonardite products were very different with  
47 leonardite products being low and RO being high in carboxylic functional groups. Light had a  
48 strong impact on the properties of leonardite products, including loss of color and increased  
49 particle formation. Furthermore, HF had drastic impacts on bacteria as light stimulated bacterial  
50 production and modified community composition, while dark conditions appeared to inhibit  
51 bacterial processes. While none of the browning agents inhibited the growth of the tested  
52 phytoplankton, *Gonyostomum semen*, leonardite products had detrimental effects on zooplankton  
53 abundance and *Daphnia* reproduction. We conclude that the effects of browning agents extracted  
54 from leonardite are in sharp contrast to those originating from terrestrially-derived DOM. Hence,  
55 they should be used with great caution in experimental studies on the consequences of terrestrial  
56 carbon for aquatic systems.

57

58

## 59 **Introduction**

60 Inland waters process large amounts of terrestrial organic carbon (Cole, Prairie, Caraco and  
61 others 2007; Drake, Raymond and Spencer 2018; Tranvik, Cole and Prairie 2018). In the last  
62 decades, an increasing load of terrestrially derived dissolved organic matter (DOM) in aquatic  
63 systems of the Northern hemisphere, known as “browning”, has been described (Monteith,  
64 Stoddard, Evans and others 2007; Solomon, Jones, Weidel and others 2015). Browning has  
65 diverse consequences for aquatic ecosystems, largely due to more efficient absorption of solar  
66 radiation that alters the vertical distribution of heat and light (Fee, Hecky, Kasian and others  
67 1996; Kirk 2011). This leads to cooler deep waters while the shading also hampers  
68 photosynthesis, and thereby reduces algal food supply for higher trophic levels such as  
69 zooplankton or fish (Kelly, Solomon, Weidel and others 2014). All these mechanisms influence  
70 vertical habitat gradients, food web structures, resource subsidies, and ultimately, ecosystem  
71 services (Williamson, Overholt, Pilla and others 2015). Thus, as browning has a high potential to  
72 affect ecosystem functioning and water quality, as well as to further aggravate greenhouse gas  
73 emissions, it has become a primary subject of experimental studies targeting climate change  
74 impacts on freshwaters (Bergström and Karlsson 2019; Vasconcelos, Diehl, Rodriguez and others  
75 2019; Weyhenmeyer, Müller, Norman and others 2016).

76  
77 One challenge of experimental studies of browning is to find a browning agent that can be  
78 applied at different experimental scales and ideally also enables disentangling the impact of  
79 increasing organic carbon substrates from the impact of physical darkening of the water column.  
80 Browning agents previously applied include extracts of humic substances from soils (e.g. Lennon  
81 and Cottingham 2008), leachates from organic material (e.g. Geddes 2009), or the use of DOC-

82 rich waters (e.g. Kritzberg, Graneli, Bjork and others 2014). However, obtaining sufficient  
83 quantities of such materials to enable experimental manipulation at mesocosm or ecosystem  
84 scale, is challenging and time consuming. A further challenge is that organic matter concentrates  
85 derived from humic ecosystems may consist of a diverse and temporally variable mix of carbon  
86 compounds leading to unreproducible results. Therefore, large-scale browning experiments  
87 (mesocosm or whole-ecosystem experiments) tend to rely on commercially available products as  
88 experimental browning agents. Most commonly, leonardite (i.e., oxidized lignite) products are  
89 used, which were originally manufactured for agricultural applications such as soil management  
90 or feed amendment (Quilty and Cattle 2011). In experiments, these products have been assumed  
91 to mimic the natural browning phenomenon, by being fairly recalcitrant and of poor nutritional  
92 quality while having similar physical and chemical properties as those of indigenous terrestrial  
93 DOM (Lennon, Hamilton, Muscarella and others 2013), or by being considered inert browning  
94 agents with no significant impact on the total bioreactive carbon (Lebret, Langenheder, Colinas  
95 and others 2018). However, there are indications that the use of these leonardite products may  
96 compromise the original purpose of their application in browning studies. For example, Urrutia-  
97 Cordero, Ekvall, Ratcovich and others (2017) reported the need to frequently re-supply the  
98 leonardite product HuminFeed during the course of an experiment in order to maintain the  
99 desired increase in water color. Lennon, Hamilton, Muscarella and others (2013) also described  
100 high flocculation rates of the leonardite product SuperHume when used in alkaline ponds as  
101 sinking of particles exported 5-12% of the total dissolved organic carbon (DOC) pool daily to the  
102 sediment.

103 Indeed, environmental conditions affect the behavior of browning agents in both natural and  
104 experimental settings. In lakes, formation of particles can be promoted by, for example, sunlight  
105 (Porcal, Dillon and Molot 2013; von Wachenfeldt, Sobek, Bastviken and others 2008), low pH,

106 microbial activity (von Wachenfeldt, Bastviken and Tranvik 2009) and high concentrations of  
107 multivalent ions, in particular  $\text{Ca}^{2+}$  and  $\text{Mg}^{2+}$ , which are typical for high alkalinity (i.e., hard  
108 water) lakes (Abate and Masini 2003). In addition, the fate of DOM compounds in freshwater  
109 ecosystems depends on their chemical composition, affecting their susceptibility to both  
110 photochemical and biological degradation (Kellerman, Dittmar, Kothawala and others 2014;  
111 Mostovaya, Hawkes, Köhler and others 2017). Sunlight mediated photoreactions can both  
112 completely mineralize DOC molecules or modify their bioavailability through the alteration of  
113 the molecular structure (Moran and Zepp 1997; Wetzel, Hatcher and Bianchi 1995). As the nature  
114 of the leonardite products used in browning experiments is largely unknown, the consequences of  
115 their exposure to sunlight and other environmental conditions are unpredictable and largely  
116 unknown.

117  
118 The bioavailability of the browning agents used in manipulation studies and their effects on the  
119 microbial loop are crucial aspects that must be considered when evaluating their suitability in  
120 browning experiments. While the terrestrial DOM responsible for natural browning of  
121 freshwaters contains a labile fraction that serves as a carbon source for heterotrophic bacteria  
122 (Guillemette, McCallister and del Giorgio 2016), the leonardite browning agents used in  
123 experiments are believed to rather exclusively mimic the water color changes of the browning  
124 process (Lebret, Langenheder, Colinas and others 2018). However, while the effects of browning  
125 agents on bacterial communities and their functions remain unknown, Lennon, Hamilton,  
126 Muscarella and others (2013) showed that certain bacterial strains can use leonardite browning  
127 agents as a sole carbon source.

128

129 Additionally, leonardite products, such as HuminFeed and SuperHume, may contain compounds  
130 that are harmful or even toxic to organisms at higher trophic levels. Saebelfeld, Minguez, Griebel  
131 and others (2017) reported that HuminFeed negatively impacts reproduction and causes stress  
132 response in cultures of the cladocerans *Daphnia magna* and *Daphnia longispina*. In contrast,  
133 Lennon, Hamilton, Muscarella and others (2013) did not observe any negative effects of  
134 SuperHume on cultures of *Daphnia pulex* x *pulicaria*. Instead, they found a slight increase in  
135 fitness due to an earlier age at first reproduction.

136  
137 While there are indications that leonardite browning agents interfere with bacteria and  
138 zooplankton, their impacts on phytoplankton have not been adequately studied. In the browning  
139 context, the invasive microalgae *Gonyostomum semen* (Raphidophyceae) is of particular interest  
140 as it causes extensive blooms in brown-water lakes (Rengefors, Weyhenmeyer and Bloch 2012).  
141 Thus, there is a strong ecological and societal interest in understanding the factors influencing the  
142 mass development of this algae by conducting experimental studies under browning conditions,  
143 potentially using leonardite products.

144  
145 This study aims to assess the feasibility of the use of different browning agents commonly  
146 applied in aquatic browning manipulations by comparing their effect under different  
147 environmental conditions. This is the first time that the effects of two commercially available  
148 leonardite browning agents that are widely used in aquatic manipulation studies (i.e.,  
149 “HuminFeed”, hereafter called HF, and “SuperHume”, hereafter called SH), are compared with a  
150 reverse osmosis concentrate extracted from a humic aquatic ecosystem (“Reverse Osmosis”,  
151 hereafter called RO). We characterized the browning agents chemically and tested whether they  
152 would act as an inert carbon source or if they would be bioavailable and, thus, subsidize the food

153 web. Therefore, a mesocosm study was conducted to test responses at semi-natural scale, and  
154 several complementary laboratory experiments addressed specific processes. We assessed effects  
155 of the browning agents on both abiotic (chemical diversity and particle formation of organic  
156 matter), and biotic parameters (including bacterial production (BP), bacterial community  
157 composition (BCC), phytoplankton growth, as well as zooplankton abundance and life history)  
158 (see Table 1 for a summary of experiments conducted).

159

160

## 161 **Materials and Procedures**

### 162 *Description of browning agents*

163 HuminFeed (HuminTech GmbH, Grevenbroich, Germany) is a commercially available food  
164 supplement for animal livestock. It is a water-soluble dry powder produced from alkaline  
165 extraction of oxidized lignite (leonardite). According to the manufacturer it consists of 82%  
166 humic substances, 18% compounds of lower molecular weights and no polysaccharides. To our  
167 knowledge, this agent has only been used in browning studies across Europe (e.g. Lebret,  
168 Langenheder, Colinas and others 2018; Meinelt, Paul, Phan and others 2007; Saebelfeld,  
169 Minguez, Griebel and others 2017; Urrutia-Cordero, Ekvall, Ratcovich and others 2017).

170

171 SuperHume (CropMaster, United Agricultural Services of America, Inc., Lake Panasoffkee,  
172 Florida, USA), another commercially available leonardite product, is a liquid containing 4%  
173 fulvic and 8% humic acids according to the manufacturer's specification. This browning agent  
174 has been used in several studies of the browning phenomenon in Northern America (e.g. Lennon,



175 Hamilton, Muscarella and others 2013; Muscarella, Jones and Lennon 2016; Weidel, Baglini,  
176 Jones and others 2017).

177  
178 For comparison, we also used a reverse osmosis apparatus to produce a humic DOM concentrate  
179 from water collected from a local humic stream draining a forested wetland (59°55'0.5.0"N,  
180 17°20'49.3"E). After an initial filtration through 0.2 µm pore size membrane filters and  
181 subsequent passage through a cation exchange resin (Dowex® 50W X8, Dow Chemical  
182 Company, Midland, MI, USA) the stream water was concentrated by reverse osmosis using a  
183 Real Soft PROS/2S unit (RealSoft, Norcross, GA, USA) as described by Serkiz and Perdue  
184 (1990), to a final concentration of approximately 800 mg C L<sup>-1</sup>. To obtain sufficient concentrate  
185 for our mesocosm experiment, we processed 3900 L of stream water that had a concentration 38  
186 mg C L<sup>-1</sup>, which required approximately 90 hours of on-site filtration.

187

### 188 *Chemical characterization of browning agents*

189 We analyzed metals in digested samples of HF, SH and RO by inductively coupled plasma  
190 adsorption emission spectroscopy (ICP AES) using a Spectro Ciros CCD ICP-AES (Spectro,  
191 Kleve, Germany) as described in Appendix 1a. To identify the chemical properties of the  
192 different browning agents, we used Nuclear Magnetic Resonance (NMR) to determine proton  
193 chemical environments using a Bruker advanced Neo 600 MHz spectrometer (<sup>1</sup>H NMR: 600.18  
194 MHz), equipped with a cryogenic tipped resonance probe TCI (CRPHe TR-1H &19F/13C/15N  
195 5mm-EZ) as described in Appendix 1b. To measure the size, charge and mass distribution of the  
196 material High Pressure Size Exclusion Chromatography – High Resolution Mass Spectrometry  
197 (HPSEC-HRMS) was conducted with an Agilent 1100 HPLC (Agilent, Santa Clara, CA, USA)  
198 equipped with a UV-Vis Diode Array Detector for sample light attenuation (Agilent 1100, Santa

199 Clara, CA, USA) and an Orbitrap mass spectrometer (LTQ-Velos Pro, Thermo Fisher Scientific,  
200 Waltham, MA, USA) in series that detected negatively ionizable molecules by electrospray  
201 ionization mass spectrometry, as described in Hawkes, Sjöberg, Bergquist and others (2019) and  
202 Appendix 1c. Solutions of HF, SH, and Suwannee River Fulvic Acid (SRFA, International  
203 Humic Substances Society, Batch 2S101F) in deuterated water (99.96%, Eurisotop) were  
204 prepared to 4.3, 5.6, and 1.25 mg ml<sup>-1</sup>, respectively. We used SRFA instead of RO because it is  
205 available in powder form, facilitating dissolution in deuterated water. Due to the similar  
206 production process, we do not assume important differences between the two samples – both are  
207 constituted by typical aquatic DOM. More details of the chemical characterization methods can  
208 be found in the Supplementary material Appendix 1.

209

#### 210 *Mesocosm study: in situ responses to browning agents*

211 The effect of two different browning agents (HF and RO) and their combination (i.e., HF+RO)  
212 was assessed by a mesocosm experiment implemented for four weeks between June 15<sup>th</sup> and July  
213 13<sup>th</sup> in 2016. The mesocosm facility consisted of 20 high-density polyethylene, white opaque,  
214 open top cylinders of 2 m depth and a diameter varying between 92 and 101 cm. It was located in  
215 Lake Erken (59°50'09.6''N, 18°37'52.3''E), held and fixed to a floating wooden jetty close to  
216 the lake shore. Details of the experimental set-up can be found in Nydahl and others (2019). In  
217 short, after filling the mesocosms with lake water, four treatments with five replicates of the  
218 following DOC concentrations (mean ± standard error) were established: Control (13.0 ± 0.05 mg  
219 C L<sup>-1</sup>), HF (18.4 ± 0.06 mg C L<sup>-1</sup>), RO (18.1 ± 0.10 mg C L<sup>-1</sup>), and HF+RO (23.5 ± 0.05 mg C  
220 L<sup>-1</sup>). Every week an integrated water sample of 15-18 L was collected from each mesocosm  
221 using a 1.5 m long tube sampler, to analyze water color, particle formation (i.e., particulate matter  
222 (PM) formation), BCC, and zooplankton abundance.

223  
224 Zooplankton samples were collected by filtering 5 L of water through 55  $\mu\text{m}$  plankton net, and  
225 preserving the zooplankton in Lugol's solution. Zooplankton was counted and species  
226 abundances were determined using an inverted microscope (Leica, DM, IL LED Fluo, Leica  
227 Microsystems GmbH, Wetzlar, Germany). The immediate impact of the two browning agents on  
228 the abundance of Copepoda and Cladocera was evaluated at the first sampling campaign, i.e.  
229 approximately 16 hours after the addition of the browning agents.

230  
231 *Microbial test: Effects on bacteria and interaction of light and browning agents*  
232 In order to assess the effect of light exposure on the browning agents, a laboratory scale  
233 experiment was performed with similar treatments as in the mesocosms but with different light  
234 conditions (hereafter called the microbial test). Four one-liter replicates of the HF, RO, HF+RO  
235 and Control treatments (initial DOC concentration: 18.0, 22.2, 27.1 and 12.9  $\text{mg C L}^{-1}$ ,  
236 respectively) were placed either in ambient day light at a window facing west or in the dark for  
237 22 days. Light and dark treatments were both performed at room temperature. Prior to the  
238 addition of the browning agents (HF and RO) the water was filtered through Whatman GF/F  
239 filters to remove larger particles, microeukaryotes, zooplankton, and phytoplankton. All  
240 treatments were sampled for bacterial production (BP) and water color at six time points (start, 6  
241 h, 24 h, 120 h, 336 h and 528 h), and for particulate organic carbon (POC), dissolved organic  
242 carbon (DOC), and DOM quality measurements by Fluorescence Excitation Emission Matrix  
243 (EEM) spectroscopy at the beginning and end (0 h and 528 h). BCC was assessed only at the end  
244 of the experiment (528 h).

245  
246 *Alkalinity test: Interaction of water hardness and browning agents*

247 To assess whether the interaction of light and browning agents depends on water hardness  
248 (measured as alkalinity and conductivity), and to compare the effects of the two most commonly  
249 used leonardite browning agents (i.e., HF and SH), a second laboratory experiment was  
250 performed (hereafter called the alkalinity test). The experiment was conducted using the three  
251 different browning agents (HF, SH, RO) added to water from Lake Erken, which is characterized  
252 by hard water (alkalinity: 1.81 meq L<sup>-1</sup>; conductivity: 27.4 mS m<sup>-1</sup> - average of 25 years of  
253 monitoring), or to water from Lake Ljustjärn (59°55'23.1''N, 15°27'18.5''E), characterized by  
254 soft water (alkalinity: 0.08 meq L<sup>-1</sup>; conductivity: 4.45 mS m<sup>-1</sup>; (Sobek, Algesten, Bergstrom and  
255 others 2003). Prior to the experiment, the lake waters were prefiltered through a 50 µm mesh-size  
256 plankton net to remove zooplankton and larger particles. For the browning agent treatments (HF,  
257 SH, RO) 10 mg TOC L<sup>-1</sup> of each of the agents were added to water from both lakes, respectively,  
258 and then incubated in light or dark. The light treatment was performed by incubating the bottles  
259 first outside in natural sunlight for 7 days (temperature between 8 and 22 °C), and subsequently  
260 in a dark constant temperature room (20 °C) for another 7-8 days. The dark incubations were kept  
261 for the entire experiment (14 days) in the dark constant temperature room. All treatments were  
262 performed in 500 mL glass bottles in triplicates. All bottles were sampled for PM concentration  
263 and DOM quality assessment by fluorescence EEM spectroscopy measurements on the first and  
264 last day of the incubations.

265

#### 266 *Ecotoxicological assay: zooplankton life history responses*

267 To assess the effect of the browning agents on the life history of zooplankton we used an acute  
268 immobilization test (OECD standard 202) and a reproduction test (OECD standard 211) with lab  
269 cultures of *D. magna*. The daphnids originated from a single clone (environmental pollution test  
270 strain *Klon 5* of the State Office for Nature, Environment, and Customer protection North-Rhine

271 Westfalia, Bonn, Germany) and were cultured in glass beakers containing M7 media (OECD  
272 standards 202 and 211) under a constant temperature of 20°C, and a 16:8 hours light:dark cycle.  
273 The animals were fed three times a week with 0.1-0.2 mg C *Daphnia*<sup>-1</sup> day<sup>-1</sup> of the green algae  
274 *Pseudokirchneriella subcapitata*. These algae were cultured in culture medium (OECD standards  
275 201) with air bubbled into the culture under constant daylight conditions and temperature (20°C).  
276 Algal concentrations were determined using a flow cytometer (Parctec CyFlow Space, Goerlitz,  
277 Germany).

278  
279 The immobilization test was carried out for 48 hours under constant temperature and light cycle  
280 (as described above). No food was provided during this test. For each browning agent (diluted in  
281 M7 medium) and a control (pure M7 medium), four replicate vials were adjusted for browning  
282 agent concentration of 5, 10, 20, and 30 mg C L<sup>-1</sup>. Five individual neonates born within 24 h were  
283 placed in each vial containing 10 ml of the respective treatment solution. After 24 and 48 hours,  
284 the number of immobilized daphnids were recorded.

285  
286 The reproduction experiment was carried out for 21 days under constant temperature, light cycle,  
287 and food conditions (as described above). The browning agents were amended to M7 medium to  
288 a concentration of 10 mg C L<sup>-1</sup> and a control was set up with pure M7 medium. Twelve replicate  
289 vials were adjusted for a concentration of one neonate per vial. Each day the daphnids were  
290 removed from the vials, separated from their offspring (if applicable) and offspring were counted  
291 before returning the experimental daphnids to their respective vials. Medium or browning agent  
292 was refreshed four times during the period of the experiment.

293 Net reproduction rate (R0) was calculated over the 21 days of the experiment using the formula:

$$R_0 = \sum_{x=0}^{21} l(x)m(x)$$

294 where  $l(x)$  is the number of individuals surviving to age  $x$  (in days), and  $m(x)$  is the number of  
295 offspring per surviving female between age  $x$  and  $x + 1$ . Furthermore, number of offspring per  
296 clutch, total number of offspring, age at first clutch, number of clutches and number of offspring  
297 at first clutch of *D. magna* was estimated.

298

### 299 *Growth dynamics of Gonyostomum semen*

300 We tested the response of *G. semen*, a phytoplankton species known to be associated to high  
301 water color (Cronberg et al. 1988, Rengefors et al. 2012), to the different browning agents. The  
302 experiment was performed using a monoclonal strain of *G. semen* isolated from the humic lake  
303 Pabezninkai in Lithuania (Karosienė, Kasperovičienė, Koreivienė and others 2016). The strain  
304 was grown in batch mode with an initial cell density of 250 cells ml<sup>-1</sup> and a total volume of 30 ml  
305 per cell culture flask (Thermo Scientific Nunc, Rochester NY, United States) under constant light  
306 intensity (100 μmol photons m<sup>-2</sup> s<sup>-1</sup> in a 14:10 hours light:dark cycle) and constant temperature of  
307 20°C. Three different concentrations of the three browning agents (HF, SH and RO) were used to  
308 test their effect on *G. semen* growth rates compared to a control (MWC+Se – Wright's  
309 cryptophyte medium MWC modified from Guillard and Lorenzen (1972), and with an addition of  
310 4.5 nM Na<sub>2</sub>SeO<sub>3</sub>. Concentrations of the three browning agents, dissolved in MWC+Se medium,  
311 were set to low (2.4 mg l<sup>-1</sup>), medium (7.2 mg l<sup>-1</sup>) and high (21.6 mg l<sup>-1</sup>) levels of DOC. Each  
312 treatment including the control had five replicates. Cell density was determined after 12 days  
313 using a FlowCam Benchtop B3 (Fluid Imaging Technologies Inc., Scarborough ME, United  
314 States) equipped with a 300 μm flow cell, and specific growth rates  $\mu$  per day during the  
315 exponential growth phase were calculated from the obtained cell densities as  $\mu = \ln(N_t/N_0)/\Delta t$ .

316

317 *Chemical analyses of experiments*

318 Prior to water color, DOC and EEMs analyses, the water samples were filtered through pre-  
319 combusted GF/F filters (Whatman, GE Healthcare, UK). Water color was measured as  
320 absorbance at 440 nm and 420 nm using a Lambda 40 UV-visible spectrophotometer (Perkin  
321 Elmer, Waltham, MA, United States). DOC concentration was measured on a Total Carbon  
322 Analyzer (Sievers M9 Laboratory Analyzer, GE Analytical Instruments, Boulder, Colorado,  
323 USA), while EEM spectroscopy for qualitative assessment of DOM was performed as described  
324 before (Kothawala, Stedmon, Müller and others 2014). Briefly, the UV-visible absorbance  
325 spectra were determined using a Lambda 40 UV-visible spectrophotometer (Perkin Elmer), while  
326 EEMs were obtained using a fluorescence spectrophotometer (SPEX FluoroMax-4, Horiba Jobin  
327 Yvon, Kyoto, Japan). Milli-Q water was used as blank and its values were subtracted from the  
328 EEM, which were also corrected for instrument biases and inner filter effects.

329

330 Samples for particulate matter analyses were collected on pre-combusted glass microfiber filters.  
331 For total PM quantification the weight of the empty filters was extracted from the weight of dried  
332 filters. For particulate organic carbon (POC) analysis in the light test, the samples were collected  
333 on GF/F filters and acidified with 10% HCl after filtration to remove inorganic carbon prior  
334 drying in an exicator. Subsequently, POC was analyzed using an Elemental Combustion System  
335 (Costech Instruments, Cernusco s/Nav., Italy). Total organic carbon (TOC) was calculated as the  
336 sum of POC and DOC.

337

338 *Microbial analyses of experiments*

339 The BCC was assessed by filtering approximately 250 ml of water onto 47 mm diameter 0.2  $\mu\text{m}$   
340 pore-size polyether sulfone (PES) membrane filters (Supor-200, Pall Corporation, Port  
341 Washington, NY, USA). DNA was extracted from the filters and amplified, sequenced, and the  
342 raw sequences were processed as in Segura, Nilsson, Schleucher and others (2019). Briefly, the  
343 V3-V4 region of the bacterial 16S rRNA gene was amplified and sequenced on an Illumina  
344 MiSeq platform at National Genomics Infrastructure (NGI, SciLifeLab, Uppsala, Sweden) and  
345 the raw sequences were processed into operational taxonomic units (OTUs) using the UNOISE  
346 pipeline (Edgar 2016). Samples with less than 5000 reads were removed, leaving 29 samples for  
347 the final data analyses. Prior to these analyses, all remaining samples were rarefied to the sample  
348 with lowest read count.

349  
350 Heterotrophic bacterial production (BP) was determined immediately after sampling via the  
351 measurement of the incorporation rate of L-<sup>3</sup>H-leucine (Perkin Elmer, Waltham, Massachusetts,  
352 USA, specific activity 161 Ci mmol<sup>-1</sup>) into the protein fraction based on the protocol of Smith  
353 and Azam (1992) as in Székely, Berga and Langenheder (2013).

354  
355 *Data analyses*

356 Processing of the EEMs was performed using MatLab (MatLab 7.7.0, The MathWorks, Natick,  
357 USA) and the *FDOMcorr* toolbox (Murphy, Butler, Spencer and others 2010) as described before  
358 in Kothawala, Stedmon, Müller and others (2014). Based on Fellman, Hood and Spencer (2010),  
359 the specific peaks C, A, T, B and M were extracted for further qualitative analyses of DOM. All  
360 statistical analyses were performed using the R (version 3.4.3) environment for statistical  
361 computing (R Core Team 2018). The effect of the different treatments was assessed by  
362 comparing either the parameters measured at the end of the experiments or the changes of the



363 parameters during the experiments by calculating the difference between the final and initial  
364 values. The importance of the different treatments was estimated by linear models tested by  
365 analyses of variances (ANOVA). Alternatively, to test the effect of the treatments in time for PM  
366 and for BP in the case of the mesocosms experiment and the microbial test, respectively, a mixed  
367 effect model repeated measures ANOVA was performed using treatment, time and their  
368 interaction as fixed effects and mesocosm ID as random factor. Significant differences between  
369 treatments were determined by coefficients of the model or Tukey`s post hoc analyses. To fulfill  
370 the assumptions of the applied ANOVAs data was log-transformed when necessary (number of  
371 offspring at first clutch of *D. magna*, POC in the microbial test, PM in soft water of the alkalinity  
372 test), or inverse-transformed (age at first clutch of *D. magna*).

373  
374 Ordination of multivariate data was implemented by non-metric multidimensional scaling  
375 (NMDS) with Euclidean and Bray-Curtis dissimilarity indexes for the change in the specific  
376 peaks of EEMs (i.e., A, B, C, M, T peaks) and bacterial OTUs, respectively. The importance of  
377 the different treatments was assessed by permutational analyses of variances (PERMANOVA,  
378 999 permutations). All multivariate analyses were performed using the vegan package of R  
379 version 3.6.1. (Oksanen, Blanchet, Friendly and others 2017).

380

381

## 382 **Assessment**

383 *Chemical characterization of browning agents*

384 Compared to SH and RO, HF had elevated levels of aluminum, iron and sodium, while SH had  
385 higher concentrations of calcium compared to HF and RO, and higher aluminum and iron than  
386 the RO (Table 2).

387  
388 NMR showed that HF and SH are both characterized by high abundance of aromatic protons in  
389 comparison to SRFA. The abundance of aliphatic ‘terpenoid-like’ protons (0-1.6 ppm) was  
390 similar for all three, and SRFA had the highest abundance of carboxylic rich alicyclic material  
391 and carbohydrates (Supplementary figure Appendix 2).

392  
393 HPSEC-HRMS indicated strong light absorbance properties over the chromatographic separation  
394 of all three browning agents (Supplementary figure Appendix 3). Only the SRFA sample  
395 contained ionizable material in the range 350-450 Da, where DOC is typically found to be at a  
396 maximum in mass spectrometric analyses of organic matter from aquatic environments. The  
397 elution time of this agent was typical for DOM using this method (Hawkes, Sjöberg, Bergquist  
398 and others 2019), between 9-12 minutes. This result indicates that HF and SH do not contain  
399 carboxylic acids, with mass 200-800 Da, which are typical for DOM from aquatic environments  
400 – and this corresponds well to the NMR data, as these mixtures also contained little carboxylic  
401 rich alicyclic material (Hertkorn, Benner, Frommberger and others 2006). Instead, they are  
402 constituted by higher molecular weight aromatic compounds, which may explain their lower  
403 solubility and tendency to coagulate.

404  
405 *Abiotic effects: water color and particle formation*

406 In the mesocosm study, as expected, the addition of all browning agents (i.e. HF, RO and  
407 HF+RO) increased water color compared to the control (repeated measures ANOVA  $F_{3,75} =$

408 1532,  $p < 0.001$ ) and the increase was the most substantial for the treatments containing HF (i.e.,  
409 HF and HF+RO, Figure 1a, Appendix 4). However, the color darkening effect of the browning  
410 agents decreased with time (effect of sampling time:  $F_{4,75} = 4.768$ ,  $p = 0.002$ ) and the most  
411 substantial changes were detected at the beginning of the experiment between the first and the  
412 second sampling (Figure 1a). PM concentrations also varied among treatments (repeated  
413 measures ANOVA:  $F_{3,16} = 73.1$ ,  $p < 0.001$ ) with the highest concentrations also measured in the  
414 HF treatments (Figure 1b). Furthermore, PM concentrations changed over time (repeated  
415 measures ANOVA:  $F_{4,64} = 5.1$ ,  $p < 0.001$ ) with HF treatments showing increasing PM  
416 concentration until the third sampling.

417  
418 In the microbial test using water from Lake Erken, the different carbon treatments (HF, RO,  
419 HF+RO and Control), the light treatment, and the interaction of the two all had a significant but  
420 variable effect on the change in water color, and POC and TOC concentration (Table 3). In the  
421 dark incubations, there was no decrease in the water color in any of the treatments (Figure 2,  
422 original absorbance values in Supplementary Figure Appendix 5 and statistical tests in  
423 Supplementary Material Appendix 6a/I), while in the light treatments, water color decreased in  
424 all treatments the decrease was significantly higher in the HF amended treatments (HF and  
425 HF+RO) than in the RO or control treatments (Figure 2a, Supplementary Material Appendix  
426 6a/I). Regarding POC concentrations, in the dark, only the samples with added HF (HF and  
427 HF+RO) increased significantly in POC compared to the control (Figure 2b, Supplementary  
428 Material Appendix 6a/I), while, in the light POC significantly increased in all treatments  
429 compared to the dark controls with the highest increases in the samples with added RO (i.e.,  
430 HF+RO and RO) (Figure 2b, Supplementary Material Appendix 6a/II). However, when DOC  
431 was considered or DOC and POC together as TOC, the picture was different. In the dark

432 incubations, DOC loss was detected in all treatments (Figure 2c), while TOC loss was detected in  
433 both treatments with RO (HF+RO and RO), and in the control, but not in the treatment with only  
434 HF (Figure 2d). The most significant loss of both DOC and TOC was measured for the treatments  
435 with RO. However, in the light incubations, the detected DOC and TOC loss was opposite to the  
436 dark treatment with the highest losses seen in both of the HF treatments (i.e., HF and HF+RO)  
437 (Figure 2c, d). Thus, when the results of the different carbon analyses are combined, it is clear  
438 that while DOC decreased in all treatments, for most cases (except HF treatment in dark and  
439 control in light) this could not be explained solely by POC increase as TOC concentration also  
440 decreased (Figure 2b-d, Supplementary Material Appendix 8).

441  
442 In the case of the hard water incubations (i.e., water from Lake Erken), PM was significantly  
443 affected by both the different added agents (i.e. HF, SH and RO) and the light conditions but not  
444 the interaction of the two types of treatments (Table 3). In both dark and light incubations, the  
445 highest increase of PM was measured for treatments with leonardite products (i.e. HF and SH).  
446 Although the PM increase was significantly higher in light than in dark, the difference between  
447 the dark and light treatment of the same agent was not significant (Figure 2d, Supplementary  
448 Material Appendix 6b/I). Unfortunately, the number of replicates decreased from 48 to 41 in the  
449 alkalinity test due to bottles breaking during the light incubations. In the case of soft water (i.e.  
450 water from Lake Ljustjärn) only the browning agents had a significant effect on the changes of  
451 PM, but not light treatment or the interaction of the two treatments (Table 3). The impact of  
452 browning agents was primarily driven by an outlier value in the light HF treatment (Figure 2e).  
453 However, no significant differences between pairwise comparisons could be detected  
454 (Supplementary Material Appendix 6b/II).

455

456 *Abiotic effects: qualitative DOM changes based on EEMs*

457 The PERMANOVA of the change of extracted EEM spectroscopy peaks during the microbial  
458 and alkalinity tests revealed significant differences between the samples depending on the  
459 browning agents (levels: control, RO and leonardite containing treatments (i.e, HF, HF+RO,  
460 SH)), water hardness and the interaction of these two factors with light (Supplementary Material  
461 Appendix 9). The largest difference between treatments was detected for the peak related to  
462 substances with high molecular weight and aromatic humic nature (Peak A), in which all the  
463 treatments including leonardite (HF+RO, HF and SH) were distinct from the control in the light  
464 treatment in hard water (Supplementary Material Appendix 10a). Also the peak related to  
465 biological activity (Peak M) had the same trend with higher values detected for the treatments  
466 with leonardite in the light treatment in hard water, though the difference was less pronounced  
467 than for the peak A (Supplementary Material Appendix 10b). This was supported by the NMDS  
468 plot (Figure 3a), which also showed clear differences among the treatments as the samples in the  
469 light treatments diverged from the samples in the dark treatments and the direction of the  
470 divergence depended on the browning agent with leonardite treatments associated to divergence  
471 along the first axis of the NMDS and RO treatments diverging along the second axis of the plot.  
472 Furthermore, the divergence along the leonardite-associated axis depended on the hardness of the  
473 water with soft water treatments showing no substantial divergence from the corresponding dark  
474 incubation treatments. Finally, a lesser divergence appeared for the hard water leonardite  
475 treatments of the alkalinity test, where the light exposure was shorter than in the light test (seven  
476 compared to 22 days).

477

478 *Biotic effects: bacterial production and community composition*

479 The PERMANOVA tests assessing the final bacterial community structure of both the  
480 mesocosms and the replicates of the microbial test revealed significant differences depending on  
481 the applied browning agent (Appendix 9). In addition, in the microbial test light and the  
482 interaction of light and browning agents was also significant. These results were supported by the  
483 NMDS plots of the two experiments (Figure 3). Specifically, by the end of the mesocosms study,  
484 the primary difference between the bacterial communities depended on the addition of the  
485 leonardite product HF, with HF and HF+RO mesocosms being clearly separated from the Control  
486 and RO mesocosms along the first NMDS axis (Figure 3b). Meanwhile, in the case of the  
487 microbial test, the interaction of light and the added browning agent was also reflected in the final  
488 bacterial community structure (Figure 3c) and their taxonomic composition of the browning  
489 agent treatments in light (Appendix 11). The communities that were incubated in dark did not  
490 differ substantially from each other, while for light incubations the Control treatments remained  
491 very similar to the dark incubations and RO treatments showed also only some minor differences  
492 in taxonomic composition and along the second axis of the NMDS, while the leonardite amended  
493 communities (i.e., HF and HF+RO) in the light treatment were substantially different from the  
494 other treatments and also presented greater variation among replicates (Figure 3c).

495

496 The heterotrophic bacterial production (BP) measured during the light test also displayed  
497 different trends for the dark and light incubations (Figure 4). The repeated measures ANOVA  
498 revealed significant effects of the different browning agent treatments (HF, RO and HF+RO) for  
499 both, the dark and light incubations (dark:  $F_{3,12} = 54.21, p < 0.001$ ; light:  $F_{3,12} = 48.02, p <$   
500  $0.001$ ). However, in the case of the dark incubation there were no significant time-related  
501 differences ( $F_{1,76} = 0.659, p = 0.419$ ;  $F_{3,76} = 0.397, p = 0.755$ ), while incubation in light resulted  
502 in time dependent differences ( $F_{1,76} = 16.71, p = 0.001$ ;  $F_{3,76} = 2.588, p = 0.059$ ). More

503 precisely, at the beginning of both dark and light incubations and throughout the dark treatment,  
504 the lowest BP values were measured for the HF treatments and the highest for the RO followed  
505 by the HF+RO (Supplementary Material Appendix 12a). In the light, however, BP in the HF  
506 treatment continuously increased with time and exceeded the control values already on the fifth  
507 day (120 h). In addition, the HF+RO incubations also showed different trends in light than in  
508 dark as they did not follow the declining trends of the RO incubations but instead became  
509 significantly higher by the end of the experiment (Supplementary Material Appendix 12b).

510  
511 *Biotic effects: zooplankton life history responses*  
512 The abundance of zooplankton was lower in mesocosms with HF (HF and HF+RO) compared to  
513 RO and Control (Figure 5), with overall significant treatment effects on the abundance of  
514 Cladocera (ANOVA:  $F_{3,16} = 4.4043$ ,  $p = 0.026$ ) and Copepoda (ANOVA:  $F_{3,16} = 11.86$ ,  $p <$   
515  $0.001$ ). Coefficients of linear model depicted a significant lower abundance of Cladocera, and  
516 Copepoda in HF treatments (HF and HF+RO) compared to Control treatment, but the  
517 zooplankton abundances in the RO treatment were not significantly different to Control  
518 (Supplementary Material Appendix 13a).

519  
520 In the immobilization test, we could not observe an acute immobilization of *D. magna* during the  
521 48-hour test period in any of the treatments. However, the different browning agents affected the  
522 reproduction of *D. magna* over the course of 21 days. Net reproductive rate (R0) that integrates  
523 both survival and fecundity was highest in the Control (64.1) and RO (57.7), and lowest in SH  
524 (52.5) and HF (45.9) treatments. The average number of offspring per clutch differed  
525 significantly between the treatments (ANOVA:  $F_{3,25} = 8.786$ ,  $p < 0.001$ ), with significantly lower  
526 numbers in all three browning agent treatments compared to the Control (Figure 6a,

527 Supplementary Material Appendix 13b). The number of total offspring differed significantly  
528 between the treatments (ANOVA:  $F_{3,25} = 4.149$ ,  $p = 0.002$ ), with significantly lower number of  
529 offspring in the HF treatment compared to the Control (Figure 6b, Supplementary Material  
530 Appendix 13c). No significant differences were found between the treatments for age at first  
531 clutch, number of clutches, or number of offspring at first clutch.

532

### 533 *Biotic effects: growth dynamics of G. semen*

534 Unfortunately, replicates with high RO concentrations were contaminated by coccoid green algae  
535 likely originating from the humic stream and could not be included in the analysis. Browning  
536 agents had a significant effect on growth rate of *G. semen* after 12 days (ANOVA:  $F_{8,36} = 8.085$ ,  $p$   
537  $< 0.001$ ; Figure 7) and growth rate in replicates with medium concentrations of RO was  
538 significantly higher compared to the control, as indicated by the post hoc comparisons  
539 (Supplementary Material Appendix 14). Furthermore, the treatments with high concentrations of  
540 HF showed a significantly lower growth rate compared to the treatment with lower concentration.

541

542

## 543 **Discussion**

544 In this study, we evaluated the suitability of leonardite products and a DOM concentrate obtained  
545 from a local aquatic environment in experimental studies of browning of freshwater ecosystems.  
546 We found that while leonardite products are very effective in establishing a light environment  
547 that mimics browning of surface waters, they have chemical characteristics that deviate from  
548 those of indigenous DOM. Consequently, leonardite agents may have biotic and abiotic effects  
549 that may bias conclusions on how browning affects ecosystems. Meanwhile, the tested DOM



550 concentrate obtained from a local source via reverse osmosis, was less efficient when it came to  
551 water color changes but had less adverse effects on water quality and biota  
552  
553 *Chemical characteristics of browning agents*  
554 Both HF and SH had higher concentrations of aluminum, iron, sodium and phosphorus than RO.  
555 The multivalent cations,  $\text{Al}^{3+}$ ,  $\text{Ca}^{2+}$ , and  $\text{Mg}^{2+}$ , can stimulate particle formation and are applied as  
556 agents in drinking water purification (Matilainen, Lindqvist and Tuhkanen 2005). Although HF  
557 and SH are both leonardite products, they also had some differences with respect to the measured  
558 inorganic constituents. HF showed higher concentrations of all analyzed ions, but calcium was  
559 comparable to SH and RO. Of these, one of the most substantial differences was in aluminum,  
560 which was eight times higher in HF than in SH. Aluminum may be toxic for microbes and other  
561 organisms (Piña and Cervantes 1996), where toxicity increases with decreasing pH. In our  
562 experiments, both lake waters had neutral to alkaline pH, thus, toxicity of aluminum was limited.  
563 Further, aluminum toxicity is connected to iron availability with low iron concentration leading  
564 to more severe toxic effects of aluminum. In HF, high aluminum was combined with high iron,  
565 and that together with high pH suggests low potential for toxic impacts. Finally, HF also had  
566 higher phosphorus and iron concentration than SH, which, if it is bioavailable, could also  
567 stimulate microbial and phytoplankton growth.  
568 The possible reasons for the variation in the composition between HF and SH could be that the  
569 leonardite used for their production comes from very different parts of the world (Germany vs.  
570 USA, respectively), and the fact that those are provided to the user in different forms. Therefore,  
571 it should be noted that especially when HF is used in manipulation studies, a range of compounds  
572 and elements are added that could provoke potential abiotic and biotic interactions.  
573 Characterization of organic constituents of browning agents by NMR and HPSEC-HRMS

574 identified HF and SH as highly distinct from material typically observed in humic waters (e.g.  
575 SRFA from the Suwannee River), as they both lack freely dissolved carboxylic acids that are  
576 typical components of naturally occurring DOC.

577

#### 578 *Abiotic effects and their consequences*

579 Both the mesocosm study and the microbial test demonstrated that the addition of both HF and  
580 RO increases water color compared to controls, with the browning effects of HF being much  
581 stronger than the effects of RO. For HF, the browning effect decreased in our mesocosms in  
582 accordance with a previous experiment, in which a weekly restocking of HF was needed in order  
583 to maintain a constant water color (Urrutia-Cordero, Ekvall, Ratcovich and others 2017). We also  
584 detected a water color decrease over time in the microbial test, but in this experiment, this only  
585 happened for the samples incubated in light, suggesting that photochemical reactions caused the  
586 color loss. Notably, the effect of light was detected in borosilicate glass bottles behind  
587 conventional window glass, where light levels were moderate and light at wavelengths <400 nm  
588 is very limited. Hence, most of the light that is expected to induce photochemical reactions in  
589 natural DOC was absent (Koehler, Broman and Tranvik 2016). As typical photosynthetic primary  
590 producers were absent from the microbial communities, biological photoreactions were also  
591 unlikely.

592

593 Besides photochemical reactions, particle formation of the browning agents and subsequent  
594 export through sedimentation could also have played a role in the loss of color, as we detected an  
595 increase in PM in the mesocosms and in the alkalinity test as well as POC increase in the  
596 microbial test. The increase in PM and POC was detected in both in dark and light and in almost  
597 all treatments including most of the controls, however, the increase was always the highest in

598 treatments with leonardite agents. These results are in line with the findings of Lennon, Hamilton,  
599 Muscarella and others (2013) who estimated a loss of 5-12% of the total mass of SH due to  
600 particle formation. The alkalinity test further suggested an interaction between the browning  
601 agents and the different ion concentrations (i.e., alkalinity) of the lake waters, as both HF and SH  
602 caused more PM formation in the hard Erken water than in the soft Ljustjärn water (Figure 2 d,  
603 e). In the microbial test the significant effect of light on POC change was caused by higher POC  
604 formation in the control and RO samples, while the extent of POC was similar in light and dark  
605 for the HF and HF+RO treatments. Meanwhile in the alkalinity test the effect of light in particle  
606 formation was not significant for treatment pairs (e.g., SH in dark vs SH in light). Overall, all  
607 these suggest that particle formation in the leonardite treatments was not affected by light making  
608 it unlikely that water color loss happened due to this process.

609  
610 The microbial test provided a more likely explanation for the substantial loss in color detected for  
611 H. TOC and DOC changes in the dark incubations showed that while all samples did decrease in  
612 DOC, this could be explained by flocculation only in the case of HF, while the control and the  
613 RO containing samples (i.e. RO and HF+RO) did experience organic carbon loss presumably due  
614 to mineralization of organic carbon through biodegradation. The fact that TOC loss in the HF  
615 treatments could be completely explained by POC formation and did not even reach the level of  
616 the controls suggests that HF was not only inert as suggested by some users (Lebret,  
617 Langenheder, Colinas and others 2018), but may have been inhibitory to the biological processes  
618 that could have degraded the background organic carbon in the water used for the experiment.  
619 This idea of inhibitory effects of HF was further supported by the effects on bacterial production.  
620 BP was low in the dark treatment of the microbial experiment, as the BP values of the HF  
621 samples remained below or close to the values of the control samples and also the values of the

622 HF+RO were mostly below the samples containing RO agent only. Meanwhile, TOC loss was  
623 highest in light exposed HF treatments (i.e., HF and HF+RO) and the HF samples had an upward  
624 trend in BP throughout the experiment with BP of both, HF and HF+RO samples, being  
625 significantly higher at the end of the experiment compared to the other treatments. This suggests  
626 that exposure to light reduced the inhibitory effect of HF, and made it prone to mineralization,  
627 likely via bacterial degradation and photomineralization. Although not specifically tested in this  
628 experiment, such process could occur in treatments with other leonardite products, e.g. SH in a  
629 similar way.

630  
631 The importance of light in determining the fate of the different agents utilized in our browning  
632 experiments was corroborated by the results of both the DOM quality assessed by EEMs and the  
633 BCC. The EEM comparison of the dark and light incubations of the microbial and alkalinity tests  
634 clearly demonstrated that the major qualitative changes in DOM depended on the exposure to  
635 light, and these changes were especially related to high molecular weight substances and  
636 substances related to biological activity. Furthermore, although all browning agents were  
637 impacted by light, it affected HF and SH differently from RO. As changes in fluorescence peaks  
638 in light were the smallest for the soft water samples, a possible explanation of the impact of light  
639 could be the fact that EEM spectroscopy probes only the quality of DOC, and not POC. Hence,  
640 EEM changes may at least in part reflect the transformation of DOC to POC due to flocculation.  
641 However, one of the most substantial differences in EEM profiles between light and dark  
642 incubations were detected in the HF samples of the microbial test where POC formation was  
643 unaffected by light. This further supports the idea that light exposure may have initiated  
644 substantial photochemical changes in the leonardite agents other than flocculation. In support of  
645 this hypothesis, we observed significant loss in color in the HF treatments but not in the RO

646 treatments (Figure 1a). These results agree with Lennon, Hamilton, Muscarella and others (2013),  
647 who proposed that the leonardite product SH may be more prone to the loss of color than DOC  
648 found in natural lakes.

649

650 *Biotic effects: bacterial responses*

651 The light-induced change in DOM also affected the BCC. The structure of the bacterial  
652 communities that developed in the HF treatments (i.e., HF and HF+RO treatments of the  
653 mesocosms and light test) clearly showed that this agent modified the bacterial communities  
654 when exposed to light. The lack of these specific differences in dark incubations suggest that the  
655 exposure to light is necessary for HF to become available for utilization by bacterial  
656 communities. This idea is supported by the results of the BP measurements as well as the results  
657 of the TOC changes during the same experiment. Combined these results suggest that light  
658 exposure increased the bioavailability of HF for heterotrophic bacteria and enhanced the  
659 mineralization of this organic carbon pool. Such potential mineralization of HF upon exposure to  
660 light substantially compromises the concept of its use as an inert “sunscreen” in browning  
661 experiments.

662

663 *Biotic effects: zooplankton life history responses*

664 In the reproduction experiment, we could not detect any stimulation of *Daphnia* growth by any of  
665 the tested browning agents. We therefore conclude that neither HF, SH nor RO would act as a  
666 subsidy for zooplankton. On the contrary, all three browning agents had negative impacts on the  
667 zooplankton. The strongest impact was seen for HF, which in the mesocosms, reduced the  
668 abundance of Cladocera and Copepoda on average by the factor of five and nine, respectively,  
669 and had negative impacts on the reproduction of daphnids. One potential reason for the negative

670 effects on Cladocera in the mesocosms could be the higher rates of particle formation observed in  
671 treatments with HF, which could interfere with the filter-feeding apparatus of the Cladocera,  
672 potentially compromising their feeding and digestion. However, this would not explain the  
673 detrimental effects on Copepoda observed in the mesocosms, as these are raptorial feeders  
674 (Brandl 2005). Another potential reason for the fitness impairments of HF on zooplankton could  
675 come from stress responses. In a previous study, *D. magna* responded to HF treatments with an  
676 increase in antioxidant capacity and oxidative damage, combined with a reduced amount of  
677 energy available (Saebelfeld, Minguez, Griebel and others 2017).

678  
679 Despite the strong impact of HF on the zooplankton in the mesocosms, it did not have a  
680 significant impact in the acute immobilization test of cultured *D. magna*, although similar  
681 concentrations were used. Possibly, *D. magna*, as one of the biggest freshwater Cladocera  
682 species, is more tolerant against harmful substances compared to the smaller species present in a  
683 natural cladoceran community (Koivisto 1995; Saebelfeld, Minguez, Griebel and others 2017).  
684 Still, all browning agents had a negative impact on the average number of offspring per clutch in  
685 the reproduction experiment. The total number of offspring was significantly lower compared to  
686 the control only in HF, but there was a decreasing trend also for SH and RO, suggesting that  
687 those may also affect *Daphnia* reproduction. These results are in line with a previous study that  
688 reported delayed maturity and reduced number of offspring combined with stress induction in *D.*  
689 *magna* in experiments using HF at a slightly higher concentration (Saebelfeld, Minguez, Griebel  
690 and others 2017). This study further reported no offspring production in *D. longispina* at high  
691 concentrations of HF (30 mg DOC L<sup>-1</sup>). Furthermore, Bouchnak and Steinberg (2013) saw a  
692 similar trend of decreased egg production in *D. magna* in the presence of HF, even at a  
693 concentration of 5 mg C L<sup>-1</sup>, but at the same time they also found that the lifespan of the

694 Cladocera increased. Nevertheless, there are also some earlier findings that contradict the  
695 negative effects of browning agents on zooplankton observed in our experiments. In a study  
696 testing SH, Lennon, Hamilton, Muscarella and others (2013) did not find any evidence of  
697 negative effects of SH on fitness of *D. pulex x pulicaria* clones, but in fact, reported a 10 %  
698 increase in the intrinsic rate of increase in a life table experiment conducted with *Daphnia*.  
699 However, they note that the positive impact was marginal and that additional experiments are  
700 needed. Our combined results of the zooplankton testing suggest dramatic and negative effects of  
701 HF on the zooplankton community. This could result in strong direct and indirect effects on  
702 overall ecosystem processes with implications also for the fish and phytoplankton. Nonetheless,  
703 the underlying causes for the adverse effects of HF on zooplankton still remain elusive.

704

#### 705 *Biotic effects: G. semen growth dynamics responses*

706 The effect of all three browning agents on the growth rate of *G. semen* were tested, but none of  
707 them had, not even at high concentrations, any negative effects. Overall, these results indicate  
708 high tolerance of *G. semen* to all three substances. Not only does this demonstrate a lack of toxic  
709 effects, but also that no light limitation was generated in these experiments. Sassenhagen,  
710 Wilken, Godhe and others (2015) showed that *G. semen* growth rates were only slightly reduced  
711 when light intensity was dropped from 150 to 25  $\mu\text{mol photons m}^{-2} \text{s}^{-1}$ . In a mesocosm or alike, it  
712 is possible that the different browning agents could have a larger effect. Growth rates were higher  
713 in treatments with RO compared to the control. Unfortunately, the RO agents were contaminated  
714 with a green algae, demonstrating that the risk of contamination using RO can be considered  
715 high, and can be explained by its origin from an active aquatic environment. RO at intermediate  
716 concentrations furthermore showed the highest variation among replicates. Therefore, extra  
717 precautions must be taken when utilizing this agent.

718

## 719 **Conclusion**

720 The purpose of this study was to evaluate the use of commercially available leonardite browning  
721 agents as an experimental analogue for indigenous DOC of terrestrial origin. Compared to RO,  
722 HF and SH are biogeochemically highly distinct. These compounds are primarily used in  
723 experiments to mimic browning of natural waters, but our results showed that the water color-  
724 modifying effect of the leonardite products decreases gradually upon exposure to light. Our  
725 results further suggest that besides the loss of color, light exposure also prompts other changes in  
726 DOM quality that lead to enhanced mineralization of organic carbon, and alterations in the  
727 composition of bacterial communities. All light-induced changes substantially compromise the  
728 concept of using leonardite in browning experiments where it is expected to act as a practically  
729 inert, recalcitrant chromophore. Moreover, having chemical properties substantially different  
730 from the DOC associated with natural browning, it is also a questionable analogue of terrestrial  
731 DOC as a subsidy to aquatic ecosystems. However, as the severity of changes was related to  
732 water chemistry (e.g., alkalinity), even leonardite may be an acceptable alternative in some cases.  
733 For example, the extent of particle formation and the quality changes of DOM depended on the  
734 alkalinity of water with substantially fewer negative effects in soft than in hard water. Further, all  
735 tested agents had negative impacts on zooplankton, with the most severe seen for HF. The  
736 impairments may be due to stress induction, but the exact mechanisms should be further  
737 investigated. Another specific problem that could arise from the use of DOM concentrates  
738 extracted from active ecosystems is the unintentional addition of local biota that as a biological  
739 contamination might bias the results of manipulation experiments, as seen from the green algae  
740 contamination in RO treatment of *G. semen* cultures.



741  
742 In conclusion, our extensive tests of leonardite products raise multiple concerns on their  
743 suitability as proxies for natural browning of freshwater ecosystems. Our experiments (this study,  
744 Attermeyer, Andersson, Catalán and others 2019; Nydahl, Wallin, Tranvik and others 2019,  
745 Chaguaceda and others in preparation) show that it is feasible to prepare reverse osmosis  
746 concentrates for browning of several thousand litres. Hence, we recommend, 1) that browning  
747 agents derived from humic aquatic environments or soils, such as RO concentrates, should be  
748 prioritized at the laboratory scale and for mesocosms with careful consideration of potential  
749 biotic contaminations, and 2) where leonardite extracts are used, great attention should be paid to  
750 effects that may be atypical for indigenous browning agents.

751 **Acknowledgements**

752 Financial support was received from the Knut and Alice Wallenberg Foundation for funding to  
753 LJT (Grant KAW 2013.0091). We are extremely grateful to all those people involved in  
754 maintaining and sampling the mesocosms, especially William Colom Montero, Fernando  
755 Chaguaceda, Sara Andersson, Carolin Hiller, and Holger Villwock for all the help in the field and  
756 the laboratory. Thanks also to Don Pierson, Björn Mattson, and Christer Strandberg for technical  
757 assistance and to Jean Pettersson, Helena Enderskog, Kristiina Mustonen and Erika Bridell for  
758 help with laboratory analyses. Mafalda Castro gave valuable insight and guidance in *Daphnia*  
759 culturing. Judita Koreivienė provided the *G. semen* monoculture.

760 **Tables**

761 **Table 1:** Overview of experiments for evaluating the effects of browning agents. HF=  
 762 HuminFeed, SH= SuperHume, RO= Reverse osmosis concentrate, SRFA= Suwannee river fulvic  
 763 acid, PM= particulate matter, BCC= bacterial community composition, EEM= Excitation  
 764 emission matrix, BP= bacterial production.

| Experiment                             | Browning agent                     | Manipulated parameter(s) | Responses                                          |
|----------------------------------------|------------------------------------|--------------------------|----------------------------------------------------|
| Chemical characterization              | HF, SH, RO, SRFA                   |                          |                                                    |
| Mesocosm study                         | HF, RO, HF+RO                      |                          | water color, PM, BCC, zooplankton abundance        |
| Microbial test                         | HF, RO, HF+RO                      | light                    | water color, POC, DOC; DOM quality (EEMs), BP, BCC |
| Alkalinity test                        | HF, SH, RO                         | light & alkalinity       | PM, DOM quality (EEMs)                             |
| Ecotoxicological assay <i>D. magna</i> | HF, SH, RO                         | -                        | mobilization, reproduction                         |
| <i>G. semen</i> growth                 | HF, SH, RO (3 concentrations each) | -                        | cell density                                       |

765  
766

767 **Table 2:** Chemical composition of HuminFeed, SuperHume and Reverse Osmosis dry extracts in  
768  $\mu\text{g (mg C added)}^{-1}$ . LOD = Limit of detection.

| Browning agent  | Al    | As    | Ca   | Cu    | Fe     | Na     | Ni    | P     | Zn    |
|-----------------|-------|-------|------|-------|--------|--------|-------|-------|-------|
| HuminFeed       | 79.31 | 0.078 | 19.9 | 0.061 | 24.016 | 41.576 | 0.097 | 0.265 | 0.045 |
| SuperHume       | 10.81 | <LOD  | 84.9 | <LOD  | 8.504  | 11.389 | <LOD  | 0.021 | <LOD  |
| Reverse Osmosis | 0.79  | <LOD  | 45.3 | <LOD  | 1.896  | 8.689  | <LOD  | <LOD  | <LOD  |

769

770 **Table 3:** Water color changes (Absorbance at 420nm) and flocculation occurring in treatments of  
 771 the different browning agents (HuminFeed, SuperHume and Reverse Osmosis). Results of  
 772 ANOVAs from the microbial and alkalinity test. Bold font depicts significant effects with  $p <$   
 773 0.05.

|                 | Microbial test     |                 |              |                 |              |                 | Alkalinity test |                 |              |              |
|-----------------|--------------------|-----------------|--------------|-----------------|--------------|-----------------|-----------------|-----------------|--------------|--------------|
|                 | Abs <sub>420</sub> |                 | POC*         |                 | TOC          |                 | PM hard         |                 | PM soft*     |              |
|                 | F                  | p               | F            | p               | F            | p               | F               | p               | F            | p            |
| Agent           | <b>186.7</b>       | <b>&lt;0.00</b> | <b>23.84</b> | <b>&lt;0.00</b> | <b>63.81</b> | <b>&lt;0.00</b> | <b>84.25</b>    | <b>&lt;0.00</b> | <b>4.261</b> | <b>0.027</b> |
|                 |                    | <b>1</b>        |              | <b>1</b>        |              | <b>1</b>        |                 | <b>1</b>        |              |              |
| Light           | <b>1039</b>        | <b>&lt;0.00</b> | <b>67.00</b> | <b>&lt;0.00</b> | <b>126.3</b> | <b>&lt;0.00</b> | <b>8.934</b>    | <b>0.011</b>    | 0.821        | 0.381        |
|                 |                    | <b>1</b>        |              | <b>1</b>        | <b>9</b>     | <b>1</b>        |                 |                 |              |              |
| Interacti<br>on | <b>215.7</b>       | <b>&lt;0.00</b> | <b>7.066</b> | <b>0.001</b>    | <b>72.10</b> | <b>&lt;0.00</b> | 2.202           | 0.141           | 1.180        | 0.355        |
|                 |                    | <b>1</b>        |              |                 |              | <b>1</b>        |                 |                 |              |              |

774 \* Log-transformed data.

775

776 **Figure legends**

777 **Figure 1:** Changes and differences of a) water color ( $Abs_{440}$ ) and b) particulate matter (PM)  
778 concentrations of four different browning agent treatments (Control, HuminFeed (HF), Reverse  
779 Osmosis concentrate (RO), and the mix of the two (HF+RO)) during the four weeks of the  
780 mesocosm study.

781  
782 **Figure 2:** Changes in measured abiotic parameters throughout the microbial (22 days) and  
783 alkalinity test (14 days) under dark and light treatments using different browning agents (Control,  
784 Reverse Osmosis concentrate (RO), and leonardite containing treatments (HuminFeed (HF),  
785 SuperHume (SH), the mix of HF and RO (HF+RO)). For the microbial test, a) changes in water  
786 color ( $Abs_{420}$ ), b) particulate organic carbon (POC), c) dissolved organic carbon (DOC), and d)  
787 total organic carbon (TOC); and for the alkalinity test, changes in particulate matter (PM) in e)  
788 hard water and f) soft water are shown.

789  
790 **Figure 3:** Ordination by non-metric multidimensional scaling (NMDS) of multivariate data. a)  
791 Ordination of the changes of the main peaks of the Excitation Emission Matrix (EEM) during the  
792 microbial and alkalinity test. b) Ordination of the bacterial community composition of the  
793 replicates at the end of the mesocosms experiment, and c) at the end of the microbial test. Blue  
794 color represents control, brown represents leonardite browning agents (dark brown HuminFeed  
795 (HF), light brown SuperHume (SH)), green represents treatments containing Reverse Osmosis  
796 concentrate (RO) (light green HF+RO, dark green RO). Empty symbols represent continuous  
797 dark treatment, filled symbols represent light exposed treatments. Hard water replicates are

798 represented by triangle and square shape points, while soft water samples are symbolized by  
799 round symbols.

800

801 **Figure 4:** Changes in heterotrophic bacterial production measured by  $^3\text{H}$ -leucine incorporation  
802 during the microbial test for samples incubated in dark and light with different browning agents  
803 (Control, HuminFeed (HF), Reverse Osmosis concentrate (RO), and the mix of the two  
804 (HF+RO)).

805

806 **Figure 5:** Mean abundance ( $\pm$  standard error) of a) Cladocera, and b) Copepoda in the  
807 mesocosms with different browning agent treatments (Control, HuminFeed (HF), Reverse  
808 Osmosis concentrate (RO), and the mix of the two (HF+RO)), approximately 16 hours after  
809 addition of the browning agents.

810

811 **Figure 6:** Fitness of *D. magna* after a 21-day reproduction test cultured under different browning  
812 agent treatments (Control, leonardite containing HuminFeed (HF) and SuperHume (SH), and  
813 Reverse Osmosis concentrate (RO)). a) Number of offspring per clutch, b) total number of  
814 offspring during 21 days.

815

816 **Figure 7:** Growth rate of *Gonyostomum semen* under different treatments of browning agents  
817 (Control, leonardite containing HuminFeed (HF) and SuperHume (SH), and Reverse Osmosis  
818 concentrate (RO)) applied at different concentrations (Low, Medium, High) after 12 days.  
819 Exclusion of high concentrations RO treatments due to flagellate contamination.

820 **Figures**

821 **Figure 1:**

822

(a)

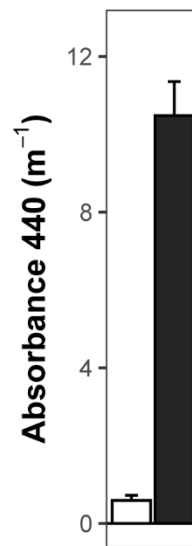

823

824 (b)

825

826

827

828

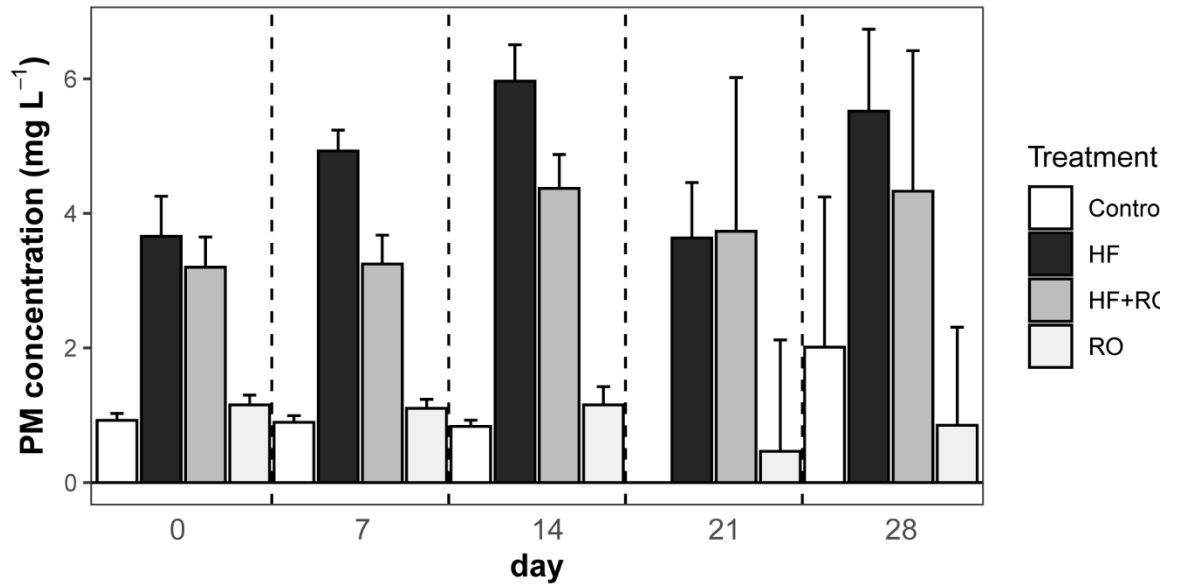



829 **Figure 2:**

830

831

832

833

834

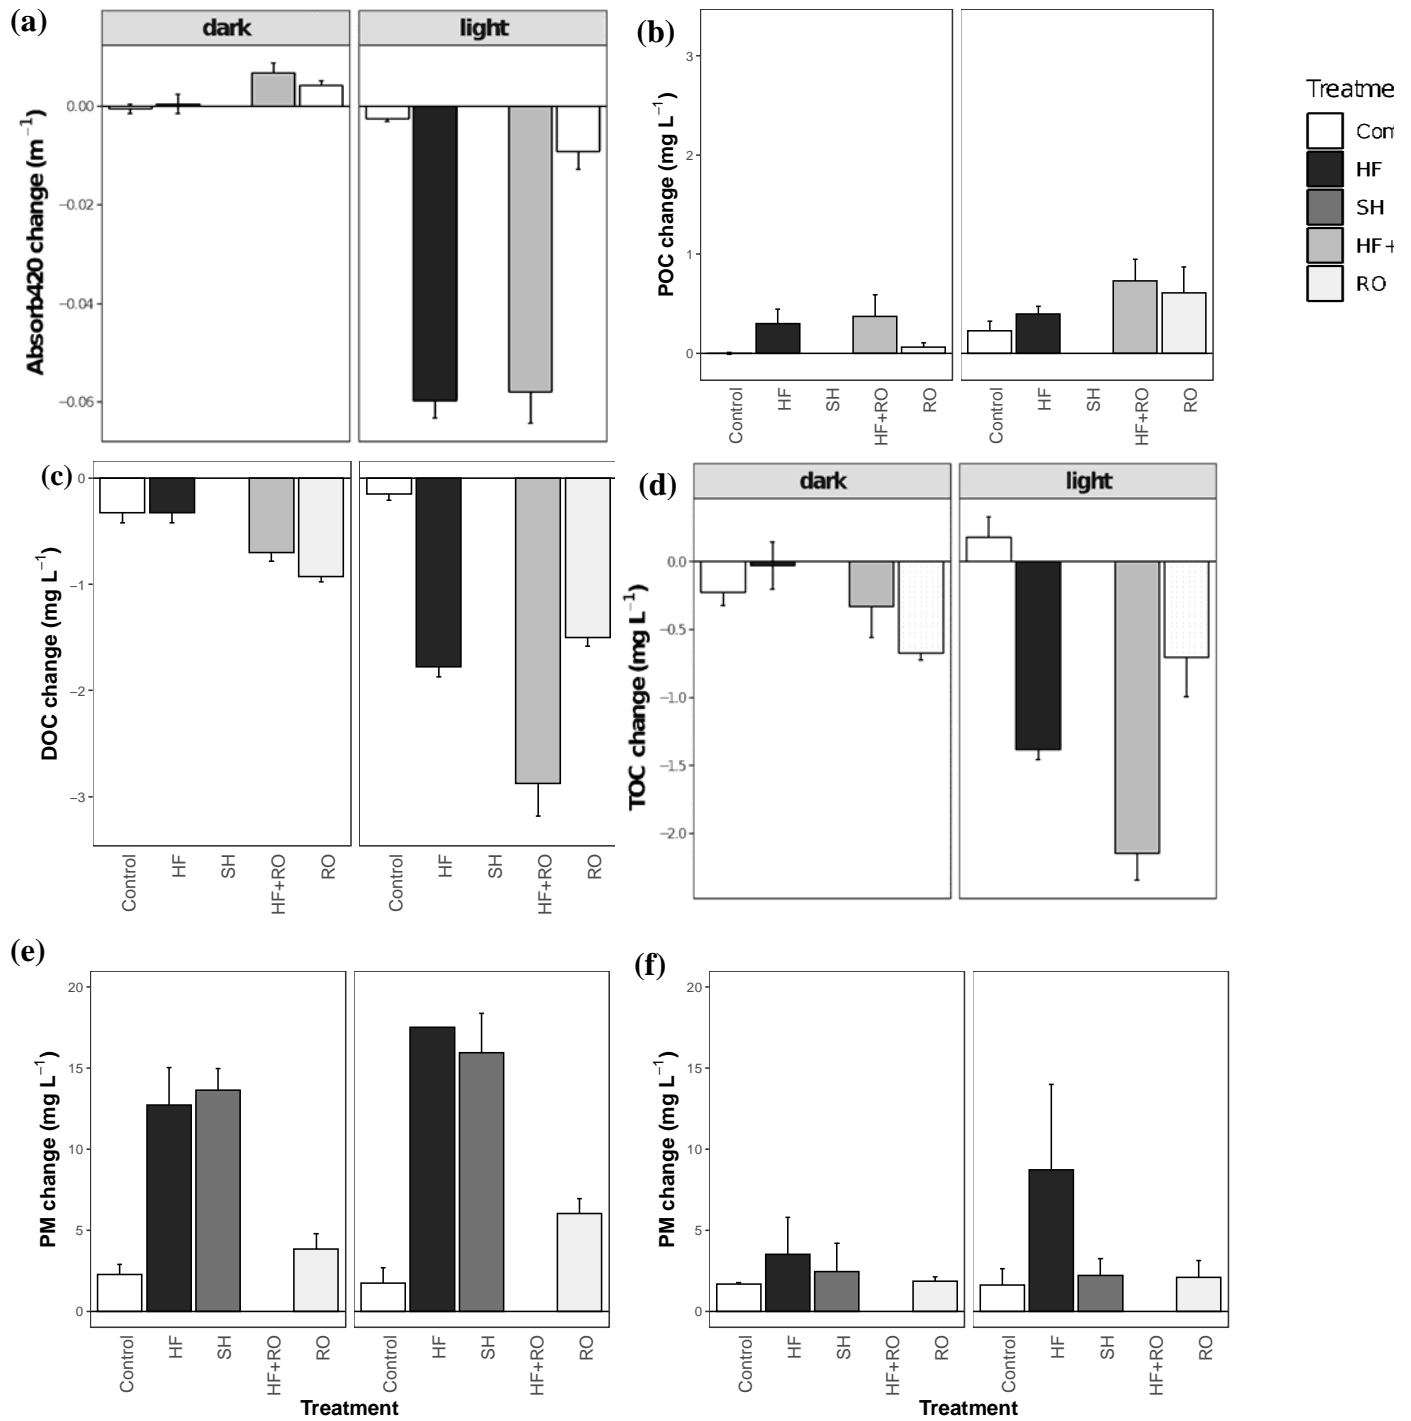

835 **Figure 3:**

836  
837  
838  
839  
840

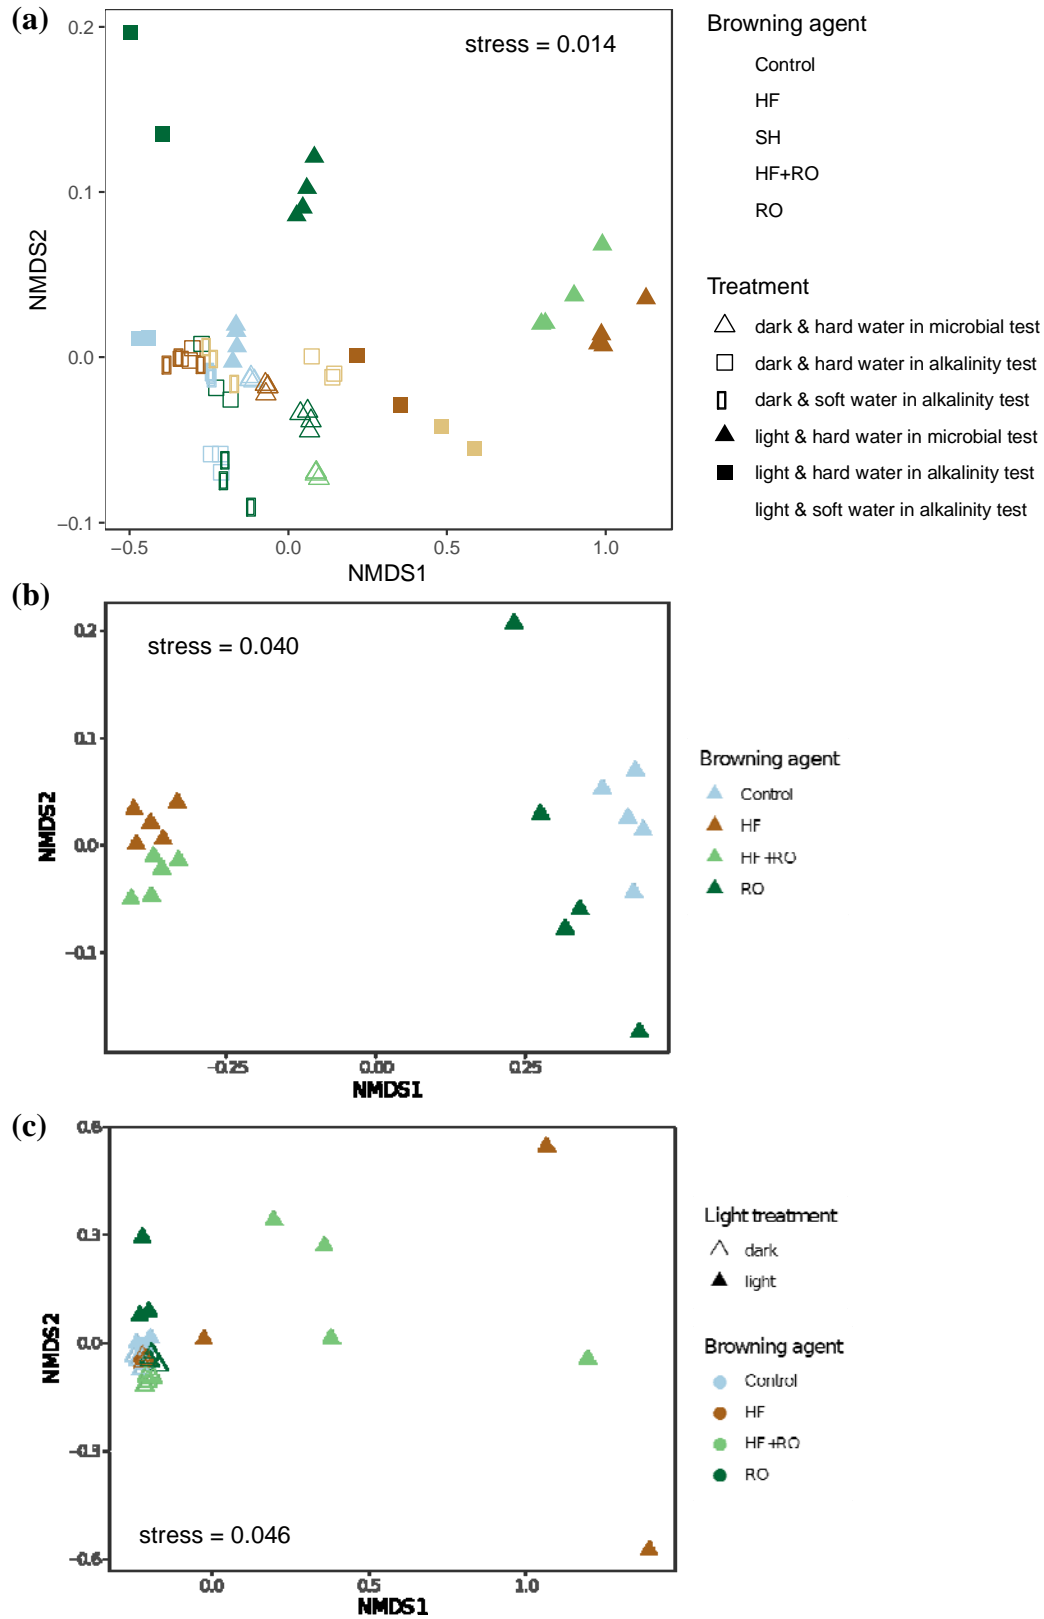

841 **Figure 4:**

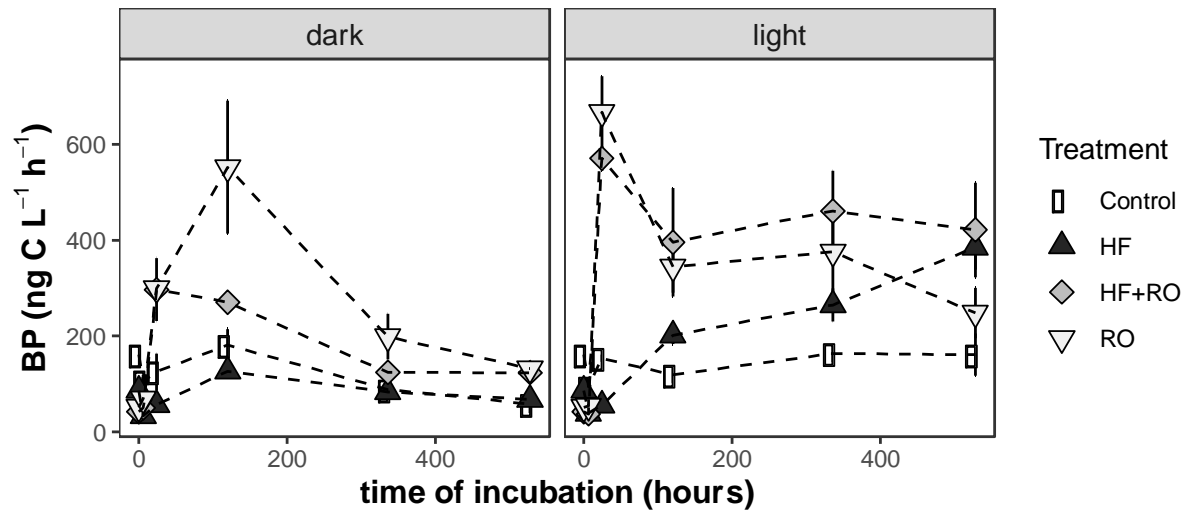

842

843

844 **Figure 5:**

845 **(a)**

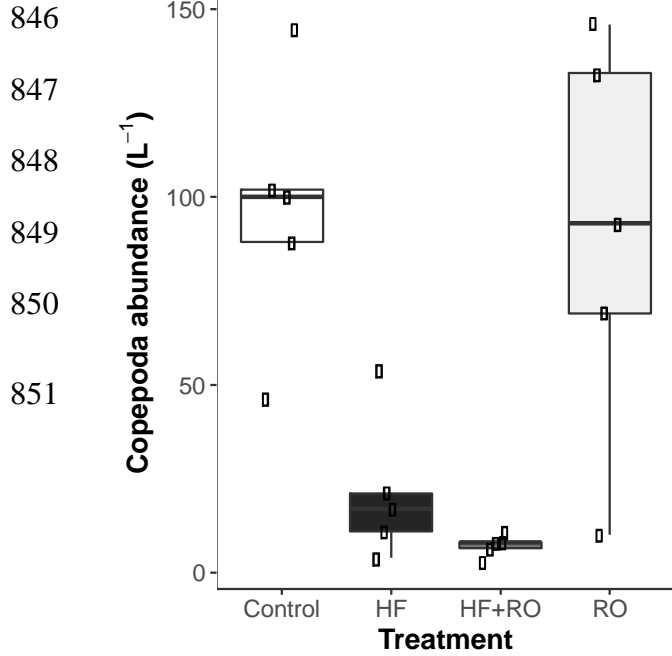

**(b)**

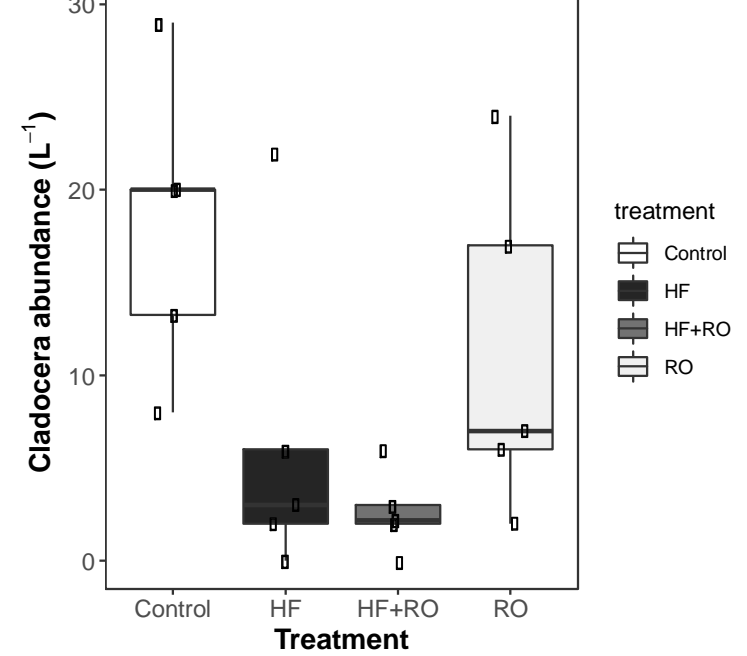

852 **Figure 6:**

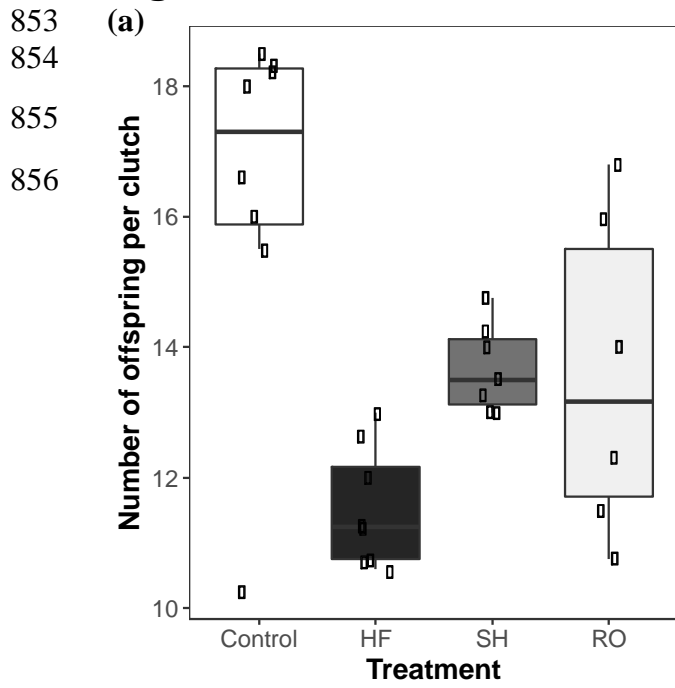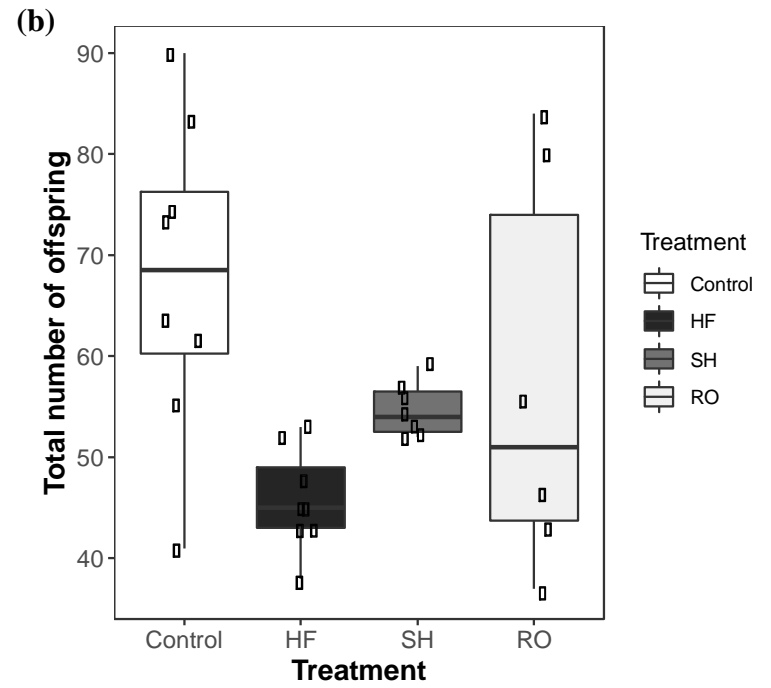

857 **Figure 7:**

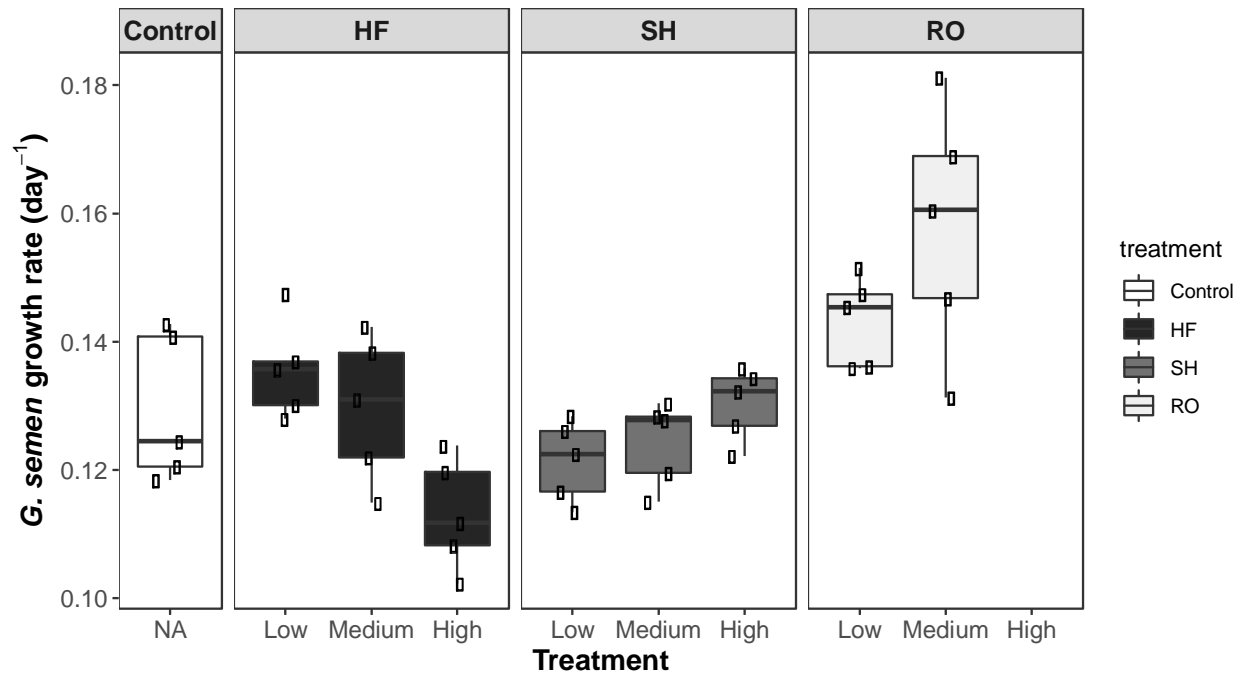

858

859 **References**

860

861 Abate, G., and J. C. Masini. 2003. Influence of pH and ionic strength on removal processes of a  
862 sedimentary humic acid in a suspension of vermiculite. *Colloid Surf. A-Physicochem.*  
863 *Eng. Asp.* **226**: 25-34.

864 Attermeyer, K., S. Andersson, N. Catalán and others 2019. Potential terrestrial influence on  
865 transparent exopolymer particle concentrations in boreal freshwaters. *Limnology and*  
866 *Oceanography* **64**: 2455-2466.

867 Bergström, A. K., and J. Karlsson. 2019. Light and nutrient control phytoplankton biomass  
868 responses to global change in northern lakes. *Global Change Biology* **25**: 2021-2029.

869 Bouchnak, R., and C. E. W. Steinberg. 2013. Algal diets and natural xenobiotics impact energy  
870 allocation in cladocerans. I. *Daphnia magna*. *Limnologia* **43**: 434-440.

871 Brandl, Z. 2005. Freshwater copepods and rotifers: predators and their prey. *Hydrobiologia* **546**:  
872 475-489.

873 Cole, J. J., Y. T. Prairie, N. F. Caraco and others 2007. Plumbing the global carbon cycle:  
874 Integrating inland waters into the terrestrial carbon budget. *Ecosystems* **10**: 171-184.

875 Drake, T. W., P. A. Raymond, and R. G. M. Spencer. 2018. Terrestrial carbon inputs to inland  
876 waters: A current synthesis of estimates and uncertainty. *Limnology and Oceanography*  
877 *Letters* **3**: 132-142.

878 Fee, E. J., R. E. Hecky, S. E. M. Kasian, and D. R. Cruikshank. 1996. Effects of lake size, water  
879 clarity, and climatic variability on mixing depths in Canadian Shield lakes. *Limnology*  
880 *and Oceanography* **41**: 912-920.

- 881 Fellman, J. B., E. Hood, and R. G. M. Spencer. 2010. Fluorescence spectroscopy opens new  
882 windows into dissolved organic matter dynamics in freshwater ecosystems: A review.  
883 *Limnology and Oceanography* **55**: 2452-2462.
- 884 Geddes, P. 2009. Decoupling carbon effects and UV protection from terrestrial subsidies on pond  
885 zooplankton. *Hydrobiologia* **628**: 47-66.
- 886 Guillemette, F., S. L. McCallister, and P. A. del Giorgio. 2016. Selective consumption and  
887 metabolic allocation of terrestrial and algal carbon determine allochthony in lake bacteria.  
888 *Isme J.* **10**: 1373-1382.
- 889 Johansson, K. S. L., T. Vrede, K. Le Bret, and R. K. Johnson. 2013. Zooplankton feeding on the  
890 nuisance flagellate *Gonyostomum semen*. *PLoS One* **8**: 6.
- 891 Karosienė, J., J. Kasperovičienė, J. Koreivienė, K. Savadova, and I. Vitonytė. 2016. Factors  
892 promoting persistence of the bloom-forming *Gonyostomum semen* in temperate lakes.  
893 *Limnologica* **60**: 51-58.
- 894 Kellerman, A. M., T. Dittmar, D. N. Kothawala, and L. J. Tranvik. 2014. Chemodiversity of  
895 dissolved organic matter in lakes driven by climate and hydrology. *Nat. Commun.* **5**: 8.
- 896 Kirk, J. T. O. 2011. Light and photosynthesis in aquatic ecosystems. Cambridge University Press.
- 897 Koehler, B., E. Broman, and L. J. Tranvik. 2016. Apparent quantum yield of photochemical  
898 dissolved organic carbon mineralization in lakes. *Limnology and Oceanography* **61**:  
899 2207-2221.
- 900 Koivisto, S. 1995. Is *Daphnia magna* an ecologically representative zooplankton species in  
901 toxicity tests? . *Environ. Pollut.* **90**: 263-267.
- 902 Kothawala, D. N., C. A. Stedmon, R. A. Müller, G. A. Weyhenmeyer, S. J. Köhler, and L. J.  
903 Tranvik. 2014. Controls of dissolved organic matter quality: evidence from a large-scale  
904 boreal lake survey. *Global Change Biology* **20**: 1101-1114.



- 905 Kritzberg, E. S., W. Graneli, J. Bjork and others 2014. Warming and browning of lakes:  
906 consequences for pelagic carbon metabolism and sediment delivery. *Freshwater Biology*  
907 **59**: 325-336.
- 908 Le Bret, K., S. Langenheder, N. Colinas, Ö. Östman, and E. S. Lindström. 2018. Increased water  
909 colour affects freshwater plankton communities in a mesocosm study. *Aquat. Microb.*  
910 *Ecol.* **81**: 1-17.
- 911 Lennon, J. T., and K. L. Cottingham. 2008. Microbial productivity in variable resource  
912 environments. *Ecology* **89**: 1001-1014.
- 913 Lennon, J. T., S. K. Hamilton, M. E. Muscarella, A. S. Grandy, K. Wickings, and S. E. Jones.  
914 2013. A source of terrestrial organic carbon to investigate the browning of aquatic  
915 ecosystems. *PLoS One* **8**.
- 916 Matilainen, A., N. Lindqvist, and T. Tuhkanen. 2005. Comparison of the efficiency of aluminium  
917 and ferric sulphate in the removal of natural organic matter during drinking water  
918 treatment process. *Environ. Technol.* **26**: 867-875.
- 919 Meinelt, T., A. Paul, T. M. Phan and others 2007. Reduction in vegetative growth of the water  
920 mold *Saprolegnia parasitica* (Coker) by humic substance of different qualities. *Aquat.*  
921 *Toxicol.* **83**: 93-103.
- 922 Monteith, D. T., J. L. Stoddard, C. D. Evans and others 2007. Dissolved organic carbon trends  
923 resulting from changes in atmospheric deposition chemistry. *Nature* **450**: 537-U539.
- 924 Moran, M. A., and R. G. Zepp. 1997. Role of photoreactions in the formation of biologically  
925 labile compounds from dissolved organic matter. *Limnology and Oceanography* **42**:  
926 1307-1316.

- 927 Mostovaya, A., J. A. Hawkes, B. Köhler, T. Dittmar, and L. J. Tranvik. 2017. Emergence of the  
928 reactivity continuum of organic matter from kinetics of a multitude of individual  
929 molecular constituents. *Environmental Science & Technology* **51**: 11571-11579.
- 930 Murphy, K. R., K. D. Butler, R. G. M. Spencer, C. A. Stedmon, J. R. Boehme, and G. R. Aiken.  
931 2010. Measurement of dissolved organic matter fluorescence in aquatic environments: an  
932 interlaboratory comparison. *Environmental Science & Technology* **44**: 9405-9412.
- 933 Muscarella, M. E., S. E. Jones, and J. T. Lennon. 2016. Species sorting along a subsidy gradient  
934 alters bacterial community stability. *Ecology* **97**: 2034-2043.
- 935 Nydahl, A. C., M. B. Wallin, L. J. Tranvik and others 2019. Colored organic matter increases  
936 CO<sub>2</sub> in meso-eutrophic lake water through altered light climate and acidity. *Limnology  
937 and Oceanography* **64**: 744-756.
- 938 Porcal, P., P. J. Dillon, and L. A. Molot. 2013. Photochemical production and decomposition of  
939 particulate organic carbon in a freshwater stream. *Aquatic Sciences* **75**: 469-482.
- 940 Quilty, J. R., and S. R. Cattle. 2011. Use and understanding of organic amendments in Australian  
941 agriculture: a review. *Soil Res.* **49**: 1-26.
- 942 Rengefors, K., G. A. Weyhenmeyer, and I. Bloch. 2012. Temperature as a driver for the  
943 expansion of the microalga *Gonyostomum semen* in Swedish lakes. *Harmful Algae* **18**:  
944 65-73.
- 945 Saebelfeld, M., L. Minguéz, J. Griebel, M. O. Gessner, and J. Wolinska. 2017. Humic dissolved  
946 organic carbon drives oxidative stress and severe fitness impairments in *Daphnia*. *Aquat.  
947 Toxicol.* **182**: 31-38.
- 948 Sassenhagen, I., S. Wilken, A. Godhe, and K. Rengefors. 2015. Phenotypic plasticity and  
949 differentiation in an invasive freshwater microalga. *Harmful Algae* **41**: 38-45.

- 950 Sobek, S., G. Algesten, A. K. Bergstrom, M. Jansson, and L. J. Tranvik. 2003. The catchment  
951 and climate regulation of pCO<sub>2</sub> in boreal lakes. *Global Change Biology* **9**: 630-641.
- 952 Solomon, C. T., S. E. Jones, B. C. Weidel and others 2015. Ecosystem consequences of changing  
953 inputs of terrestrial dissolved organic matter to lakes: current knowledge and future  
954 challenges. *Ecosystems* **18**: 376-389.
- 955 Székely, A. J., M. Berga, and S. Langenheder. 2013. Mechanisms determining the fate of  
956 dispersed bacterial communities in new environments. *Isme J.* **7**: 61-71.
- 957 Tranvik, L. J., J. J. Cole, and Y. T. Prairie. 2018. The study of carbon in inland waters-from  
958 isolated ecosystems to players in the global carbon cycle. *Limnology and Oceanography*  
959 *Letters* **3**: 41-48.
- 960 Urrutia-Cordero, P., M. K. Ekvall, J. Ratcovich and others 2017. Phytoplankton diversity loss  
961 along a gradient of future warming and brownification in freshwater mesocosms.  
962 *Freshwater Biology* **62**: 1869-1878.
- 963 Vasconcelos, F. R., S. Diehl, P. Rodriguez, P. Hedström, J. Karlsson, and P. Byström. 2019.  
964 Bottom-up and top-down effects of browning and warming on shallow lake food webs.  
965 *Global Change Biology* **25**: 504-521.
- 966 von Wachenfeldt, E., D. Bastviken, and L. J. Tranvik. 2009. Microbially induced flocculation of  
967 allochthonous dissolved organic carbon in lakes. *Limnology and Oceanography* **54**: 1811-  
968 1818.
- 969 von Wachenfeldt, E., S. Sobek, D. Bastviken, and L. J. Tranvik. 2008. Linking allochthonous  
970 dissolved organic matter and boreal lake sediment carbon sequestration: The role of light-  
971 mediated flocculation. *Limnology and Oceanography* **53**: 2416-2426.

- 972 Weidel, B. C., K. Baglini, S. E. Jones, P. T. Kelly, C. T. Solomon, and J. A. Zwart. 2017. Light  
973 climate and dissolved organic carbon concentration influence species-specific changes in  
974 fish zooplanktivory. *Inland Waters* **7**: 210-217.
- 975 Wetzel, R. G., P. G. Hatcher, and T. S. Bianchi. 1995. Natural photolysis by ultraviolet irradiance  
976 of recalcitrant dissolved organic matter to simple substrates for rapid bacterial  
977 metabolism. *Limnology and Oceanography* **40**: 1369-1380.
- 978 Weyhenmeyer, G. A., R. A. Müller, M. Norman, and L. J. Tranvik. 2016. Sensitivity of  
979 freshwaters to browning in response to future climate change. *Clim. Change* **134**: 225-  
980 239.
- 981 Williamson, C. E., E. P. Overholt, R. M. Pilla and others 2015. Ecological consequences of long-  
982 term browning in lakes. *Scientific Reports* **5**: 10.
